# Supplementary material for: Ascl1 expression defines a subpopulation of lineage-restricted progenitors in the mammalian retina
Source: Oxford University Press journal article supplement (doi:10.1242/dev.064006), 2011-07-20

**A** Fate Distribution from E12.5/E13.5 Lineage Traces

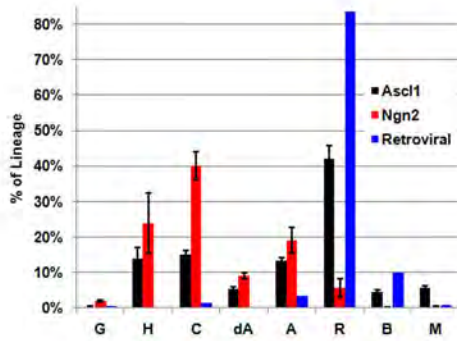

**B** Fate Distribution from E12.5/E13.5 Lineage Traces

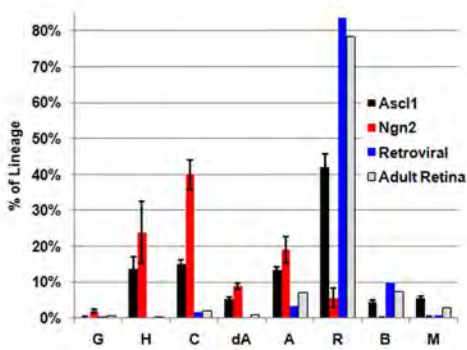

**C** Fate Distribution from E17.5 Lineage Traces

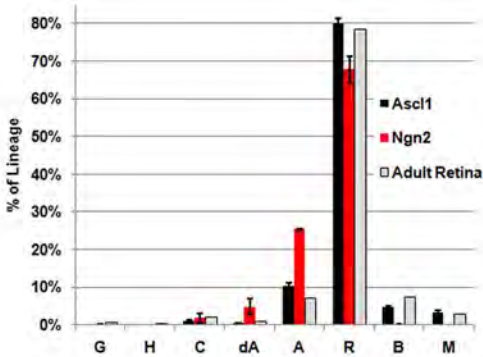

**D** RGCs from E12.5/13.5 Lineage Traces

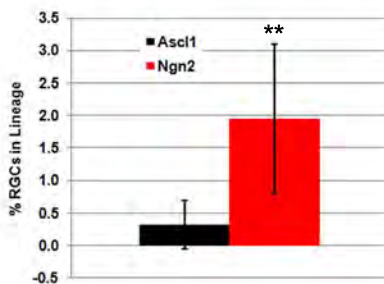

Supplement: dev064006figs4.pdf [file dev064006figs4.pdf]
