# Supplementary material for: Ascl1 expression defines a subpopulation of lineage-restricted progenitors in the mammalian retina
Source: Oxford University Press journal article supplement (doi:10.1242/dev.064006), 2011-07-20
Supplement: dev064006tables1.pdf [file dev064006tables1.pdf]

**Table S1. Ascl1, Ngn2 and retroviral lineages**

| Lineage                                                      | G*            | H*              | C*              | dA*            | A*              | R*               | B*             | M*             | Clumps <sup>†</sup> |
|--------------------------------------------------------------|---------------|-----------------|-----------------|----------------|-----------------|------------------|----------------|----------------|---------------------|
| E12.5/E13.5 Ascl1                                            | 7<br>(0.22%)  | 302<br>(9.70%)  | 483<br>(15.51%) | 149<br>(4.78%) | 447<br>(14.35%) | 1416<br>(45.46%) | 154<br>(4.94%) | 157<br>(5.04%) | 1591                |
| E12.5/E13.5 Ngn2                                             | 22<br>(1.75%) | 245<br>(19.54%) | 527<br>(42.03%) | 122<br>(9.73%) | 265<br>(21.13%) | 66<br>(5.26%)    | 3<br>(0.24%)   | 4<br>(0.32%)   | 1075                |
| E12.5+E13.5 retroviral<br>(all clones) <sup>‡</sup>          | 43<br>(0.43%) | 8 (0.08%)       | 152<br>(1.52%)  | NA             | 337<br>(3.36%)  | 8390<br>(83.67%) | 987<br>(9.84%) | 85<br>(0.85%)  | 312                 |
| E12.5+E13.5<br>Retroviral (clones<br><16 cells) <sup>§</sup> | 23<br>(5.7%)  | 6<br>(1.5%)     | 75<br>(18.7%)   | NA             | 26<br>(6.5%)    | 234<br>(58.2%)   | 33<br>(8.2%)   | 5<br>(1.2%)    | 130                 |
| E17.5 Ascl1                                                  | 0<br>(0.00%)  | 3<br>(0.06%)    | 52<br>(1.09%)   | 18<br>(0.38%)  | 489<br>(10.30%) | 3799<br>(80.00%) | 230<br>(4.84%) | 158<br>(3.33%) | 2528                |
| E17.5 Ngn2                                                   | 1<br>(0.09%)  | 0<br>(0.00%)    | 20<br>(1.84%)   | 52<br>(4.78%)  | 276<br>(25.37%) | 738<br>(67.83%)  | 1<br>(0.09%)   | 0<br>(0.00%)   | 827                 |
| Adult WT retina <sup>¶</sup>                                 | 0.6%          | 0.5%            | 2.2%            | 0.9%           | 7%              | 78.5%            | 7.4%           | 2.9%           | NA                  |

\*Number of cells observed (% of the total).

<sup>†</sup>Number of clumps or clones counted.<sup>‡</sup>From Turner et al. (Turner et al., 1990). The two datasets are pooled.<sup>§</sup>Cell fate distribution of clones containing 1-15 cells from the pooled datasets.<sup>¶</sup>From Jeon et al. (Jeon et al., 1998).

G, retinal ganglion cell; H, horizontal; C, cone; dA, displaced amacrine; A, amacrine; R, rod; B, bipolar; M, Müller glia; WT, wild type.

NA, not available. All of the ganglion cell layer-labeled cells are in the retinal ganglion cell (RGC) category.
