# Supplementary material for: Ascl1 expression defines a subpopulation of lineage-restricted progenitors in the mammalian retina
Source: Oxford University Press journal article supplement (doi:10.1242/dev.064006), 2011-07-20
Supplement: dev064006tables2.pdf [file dev064006tables2.pdf]

**Table S2. E13.5 Birthdating**

| Cell type    | Number birthdated | Total counted* | Quit fraction (%) <sup>†</sup> | Percentage born on E13.5 <sup>‡</sup> |
|--------------|-------------------|----------------|--------------------------------|---------------------------------------|
| RGC          | 45                | 150            | 14.2                           | 30.0                                  |
| Hz           | 11                | 87             | 3.5                            | 12.6                                  |
| dA           | 50                | 225            | 15.7                           | 22.2                                  |
| Cones        | 75                | ND             | 23.6                           | ND                                    |
| INL amacrine | 66                | ND             | 20.8                           | ND                                    |
| Rod          | 71                | ND             | 22.3                           | ND                                    |

Hz, horizontal cell; dA, displaced amacrine; INL, inner nuclear layer amacrine cells; RGC, retinal ganglion cell.

ND, not determined.

\*Counted from central third of the retina. RGCs were defined with pan-Brn3, and horizontals by calbindin immunostaining. Brn3-negative non-endothelial cell nuclei in the ganglion cell layer were counted as displaced amacrine.

<sup>†</sup>All intensely EdU-positive cells were summed, representing the total quit population at E13.5. The quit fraction was calculated as the number of EdU+ cells of a given type divided by all EdU+ cells.

<sup>‡</sup>The number of birthdated cells divided by the total number of cells counted of each type.
