# Supplementary material for: Ascl1 expression defines a subpopulation of lineage-restricted progenitors in the mammalian retina
Source: Oxford University Press journal article supplement (doi:10.1242/dev.064006), 2011-07-20
Supplement: dev064006tables3.pdf [file dev064006tables3.pdf]

**Table S3. Probability of finding  $\leq 7$  retinal ganglion cells (RGCs) in the 3115 cells sampled**

| Condition                       | Frequency | <i>P</i> * |
|---------------------------------|-----------|------------|
| Horizontal <sup>†</sup>         | 0.097     | 0.0000000  |
| Displaced amacrine <sup>†</sup> | 0.048     | 0.0000000  |
| Adult RGC <sup>‡</sup>          | 0.006     | 0.0018114  |

\*Probability of seeing  $\leq 7$  RGCs in the Ascl1 lineage (3115 total cells) given the frequency at which they are expected to occur using the binomial distribution.

<sup>†</sup>Frequency observed in the E12.5/E13.5 Ascl1 lineage trace.

<sup>‡</sup>From Jeon et al. (Jeon et al., 1998).
