# Supplementary material for: Ascl1 expression defines a subpopulation of lineage-restricted progenitors in the mammalian retina
Source: Oxford University Press journal article supplement (doi:10.1242/dev.064006), 2011-07-20
Supplement: dev064006tables4.pdf [file dev064006tables4.pdf]

**Table S4. E13.5 Ascl1-GFP/Math5-Cre/retinal ganglion cell (RGC) distribution**

|       | Ascl1-GFP+ | Math5-Cre+ | Brn3+ | Ascl1-GFP+/Brn3+/Math5-Cre+ |
|-------|------------|------------|-------|-----------------------------|
| Count | 239        | 886        | 987   | 1                           |
