# Supplementary material for: Ascl1 expression defines a subpopulation of lineage-restricted progenitors in the mammalian retina
Source: Oxford University Press journal article supplement (doi:10.1242/dev.064006), 2011-07-20
Supplement: dev064006tables5.pdf [file dev064006tables5.pdf]

**Table S5. Probability of finding  $\leq 1$  Ascl1-GFP+ retinal ganglion cell (RGC) at E13.5**

| Condition              | Frequency* | Ascl1 $P^{\dagger}$ | RGC $P^{\ddagger}$ |
|------------------------|------------|---------------------|--------------------|
| RGC E13.5 <sup>§</sup> | 0.360      | 0.0000000           | 0.0000000          |
| RGC quit <sup>¶</sup>  | 0.142      | 0.0000000           | 0.0000000          |

\*Frequency of RGCs used for calculations.

<sup>†</sup>Probability of seeing 0 or 1 Ascl1-GFP RGCs given the total number of Ascl1 cells seen (239) and the frequency at which RGCs are expected to occur using the binomial distribution.

<sup>‡</sup>Probability of seeing 0 or 1 Ascl1-GFP RGCs given the total number of RGCs seen (987) and the frequency at which RGCs are expected to occur using the binomial distribution.

<sup>§</sup>Percentage of cells in the E13.5 retina that are Brn3+ RGCs.

<sup>¶</sup>The fraction of all exiting cells that adopted RGC fate on E13.5.
