# Supplementary figures and images for: Ascl1 expression defines a subpopulation of lineage-restricted progenitors in the mammalian retina
Source: Oxford University Press journal article supplement (doi:10.1242/dev.064006), 2011-07-20

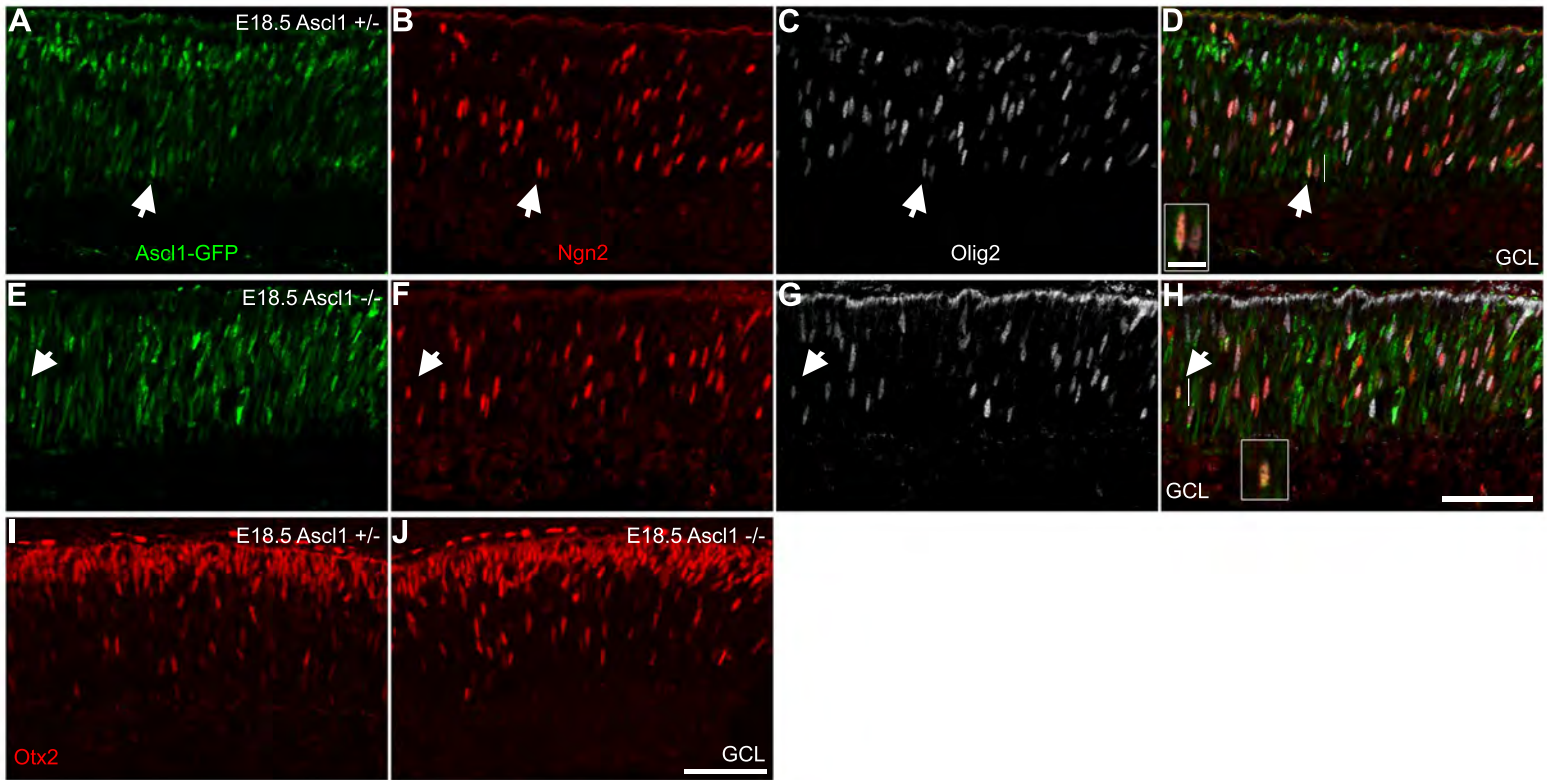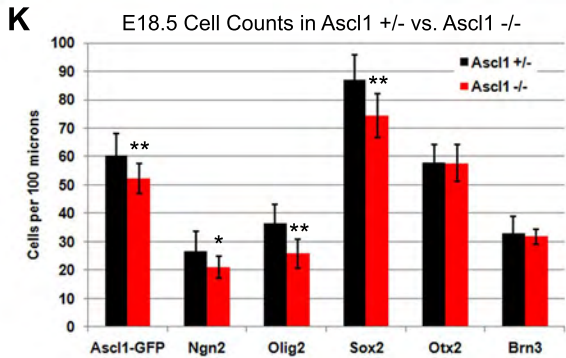

Supplement: dev064006figs1.pdf [file dev064006figs1.pdf]

**A** E12.5/E13.5 Ascl1, Ngn2, and Retroviral Lineages by Clump/Clone Size

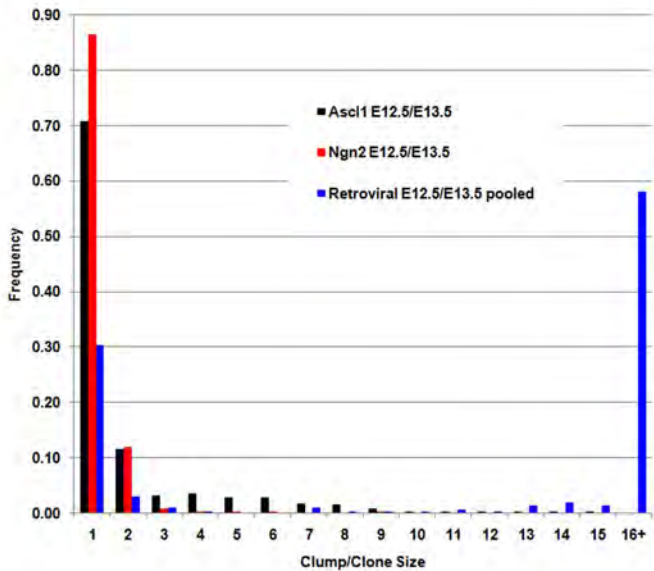

Supplement: dev064006figs10.pdf [file dev064006figs10.pdf]

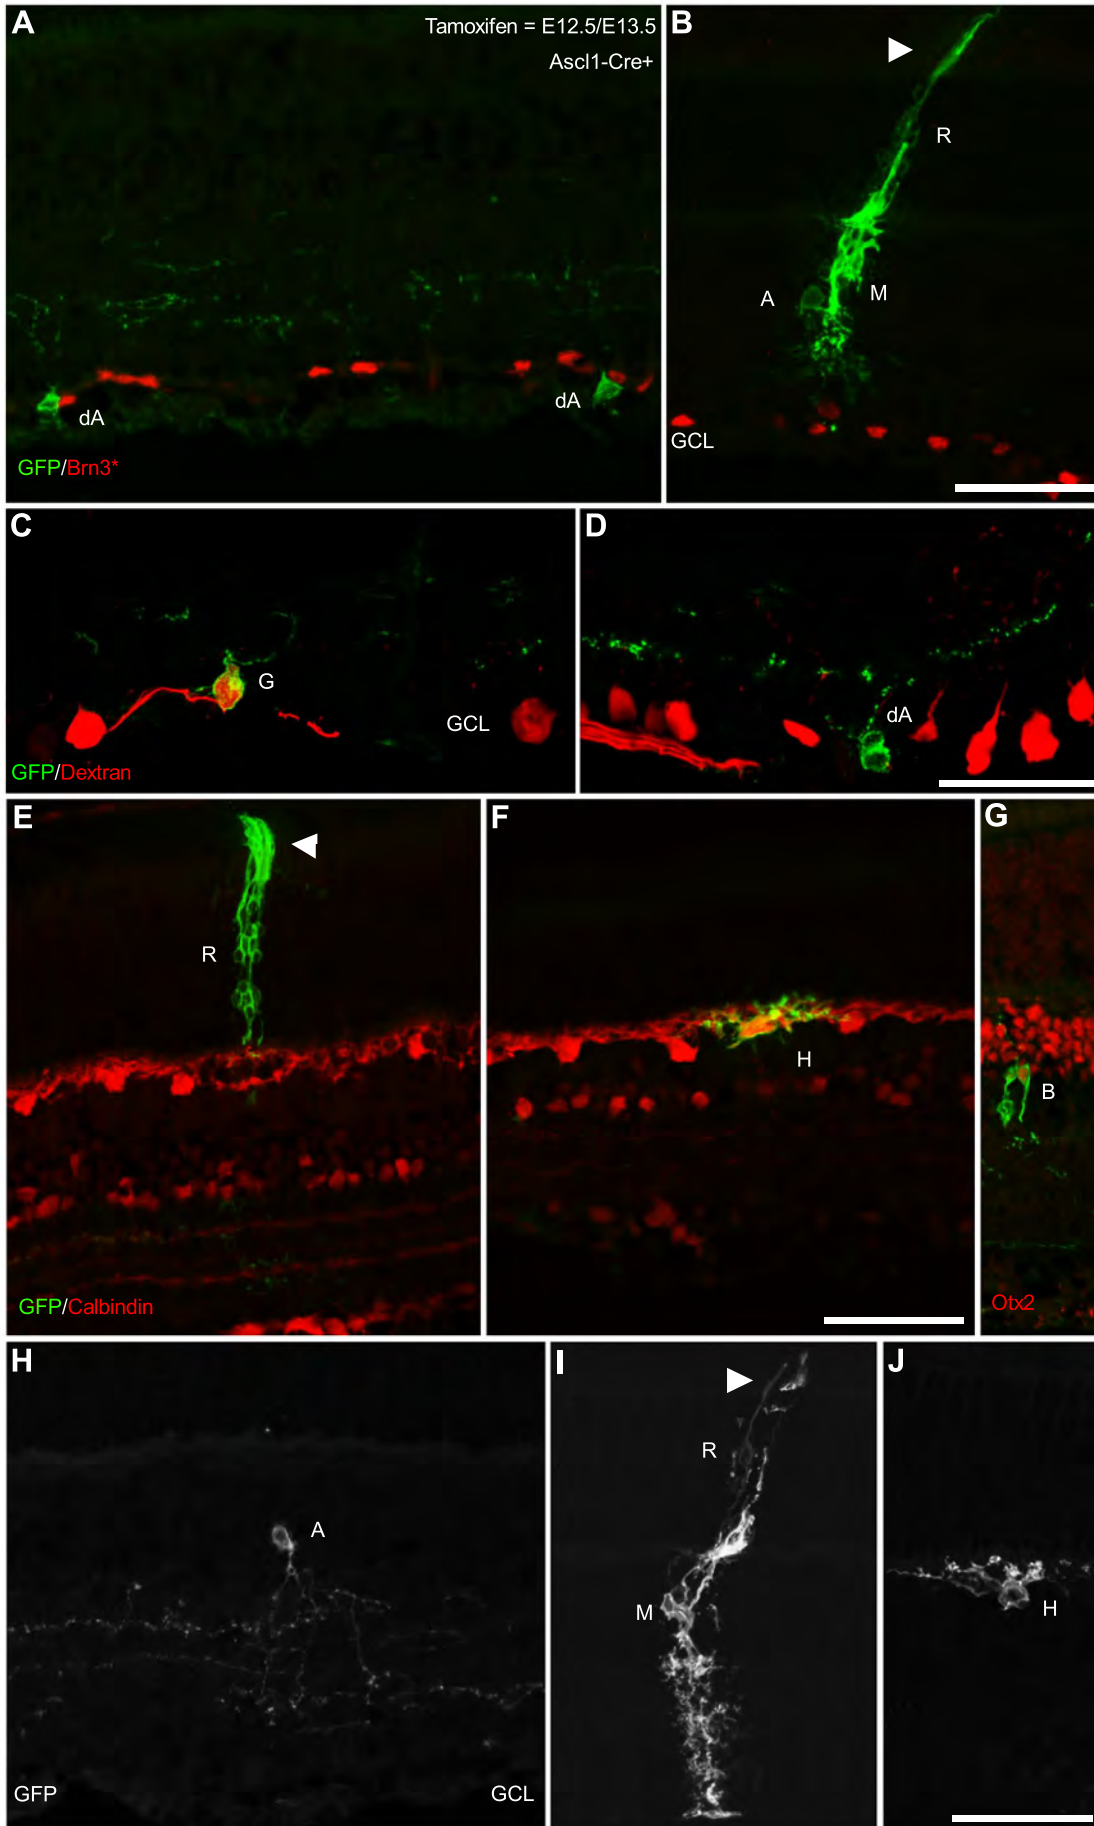

Supplement: dev064006figs2.pdf [file dev064006figs2.pdf]

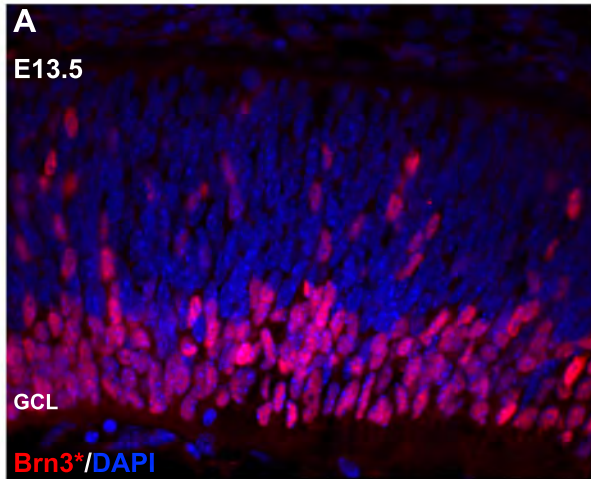

**B** Percent of Retina Labeled by Brn3 at E13.5

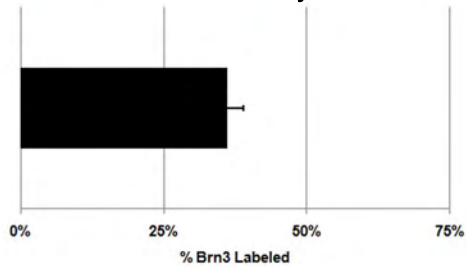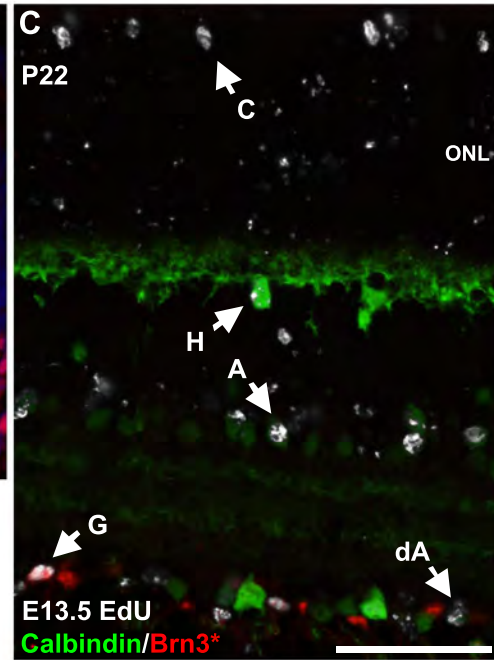

Supplement: dev064006figs3.pdf [file dev064006figs3.pdf]

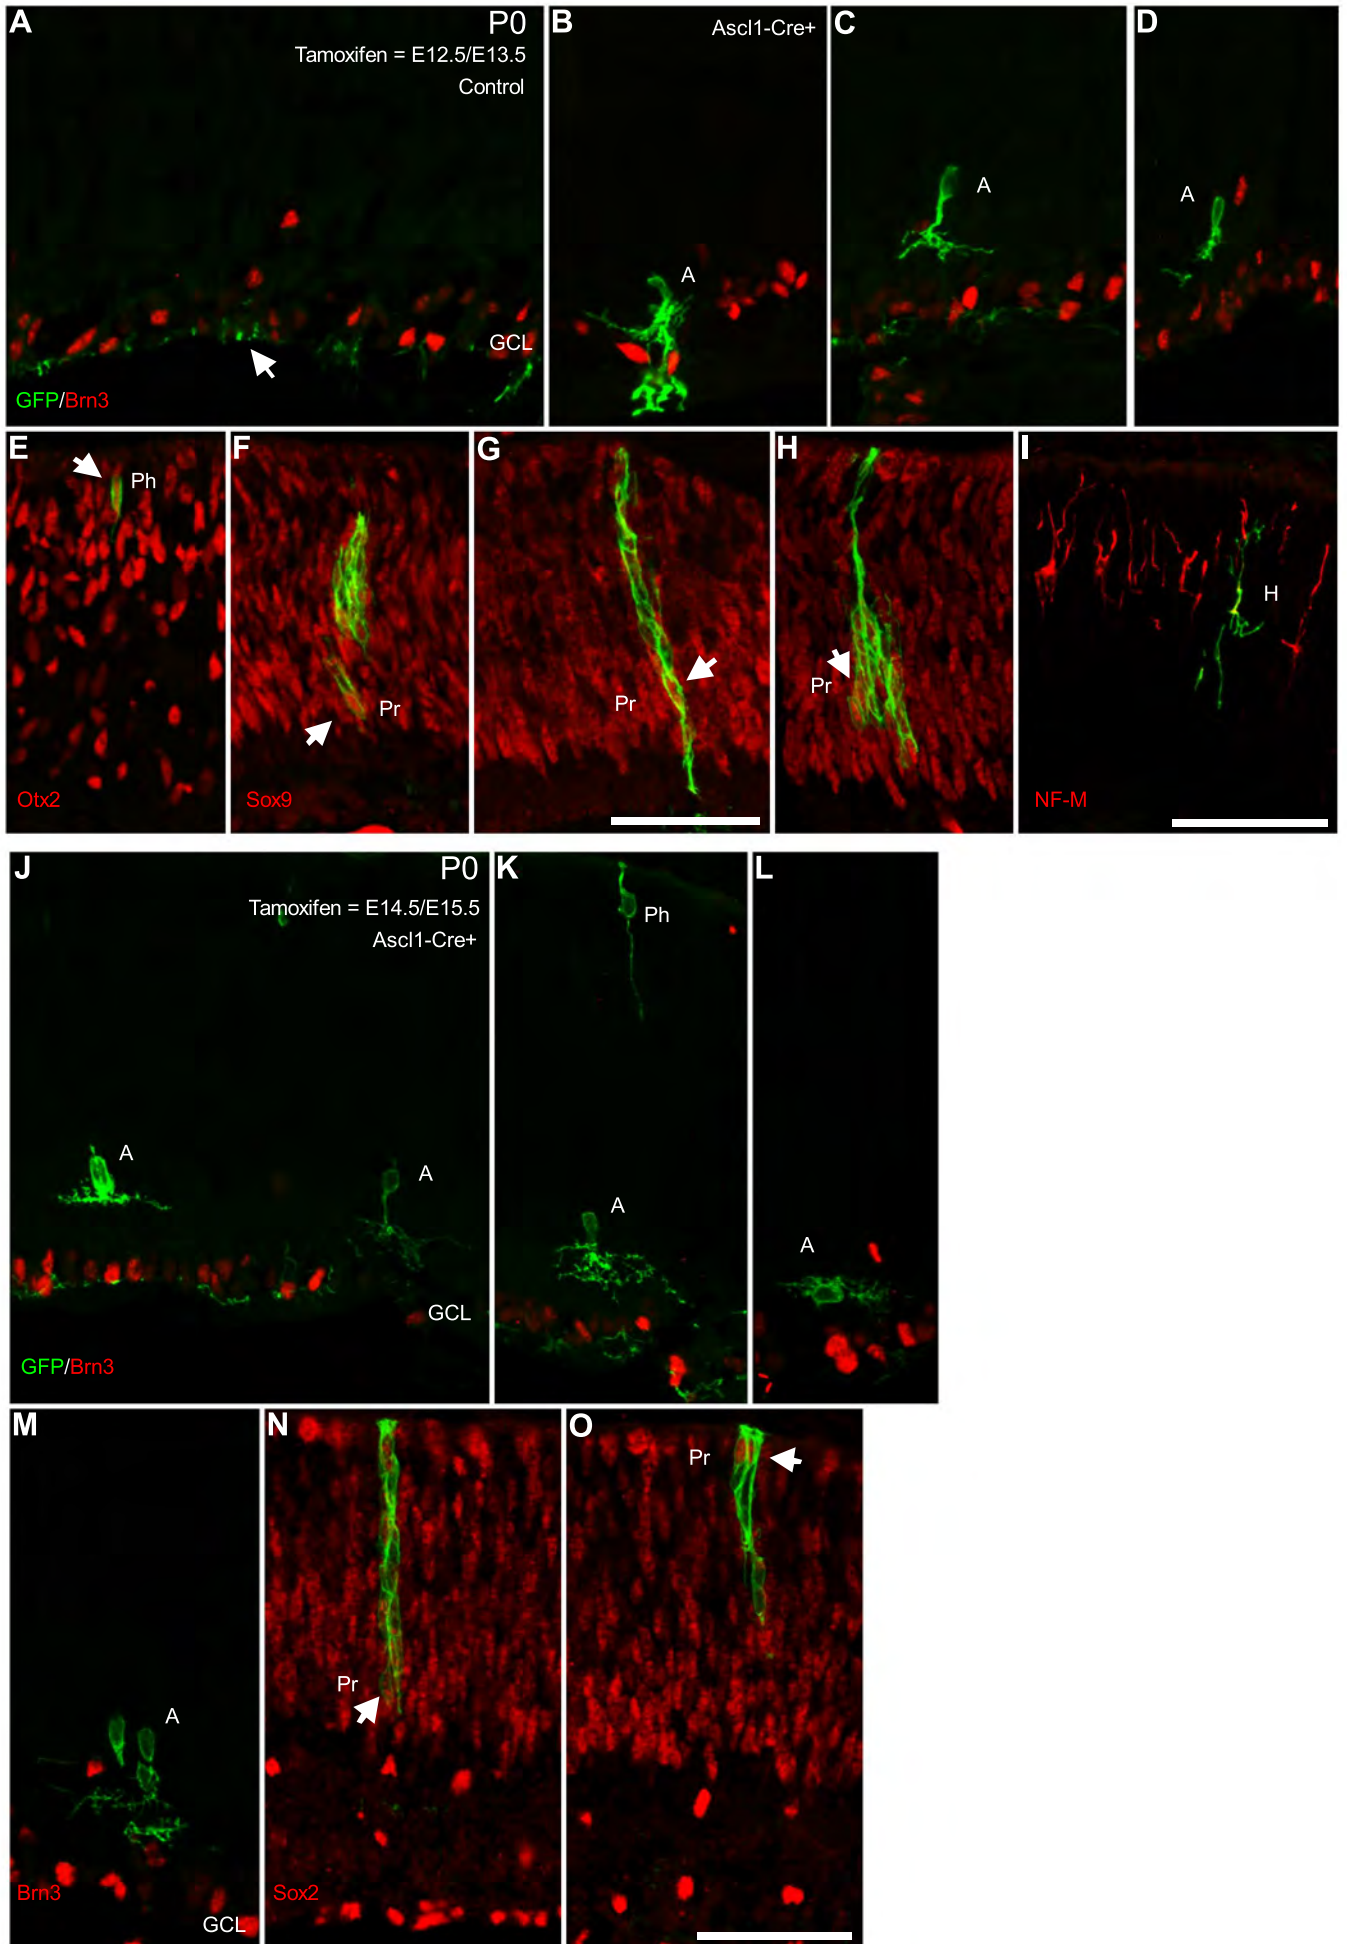

Supplement: dev064006figs5.pdf [file dev064006figs5.pdf]

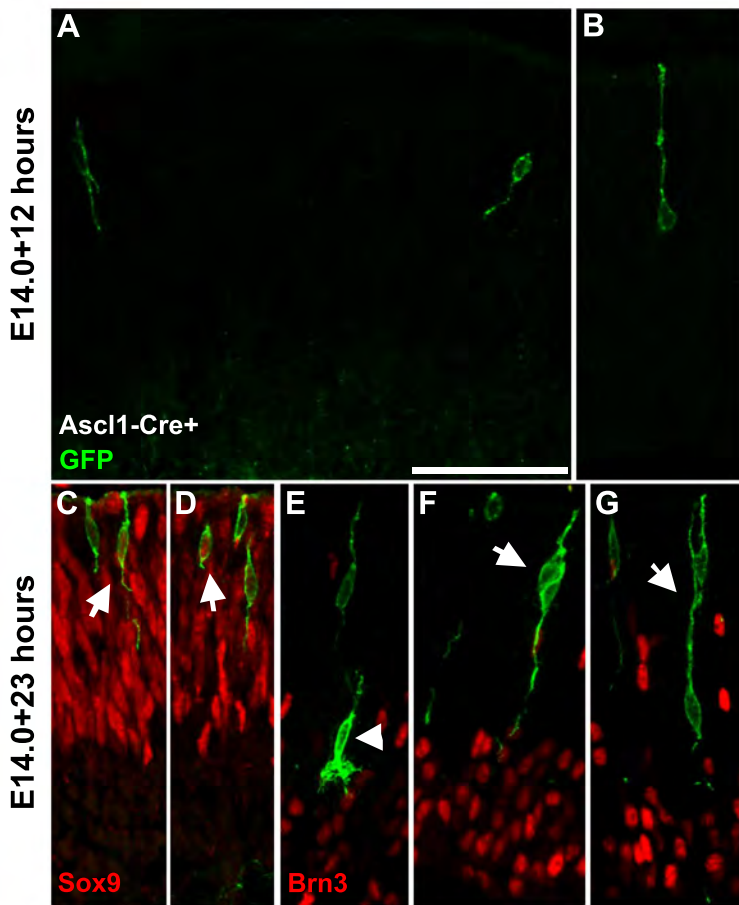

**H** Progenitor Fraction 23 Hours Post-Tamoxifen

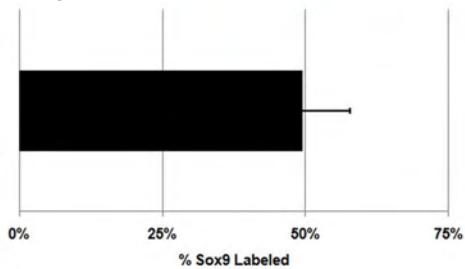

Supplement: dev064006figs6.pdf [file dev064006figs6.pdf]

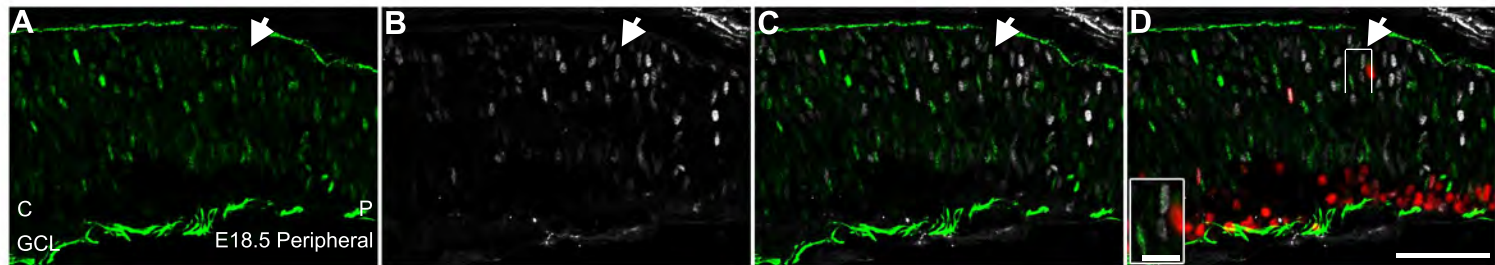

Supplement: dev064006figs7.pdf [file dev064006figs7.pdf]

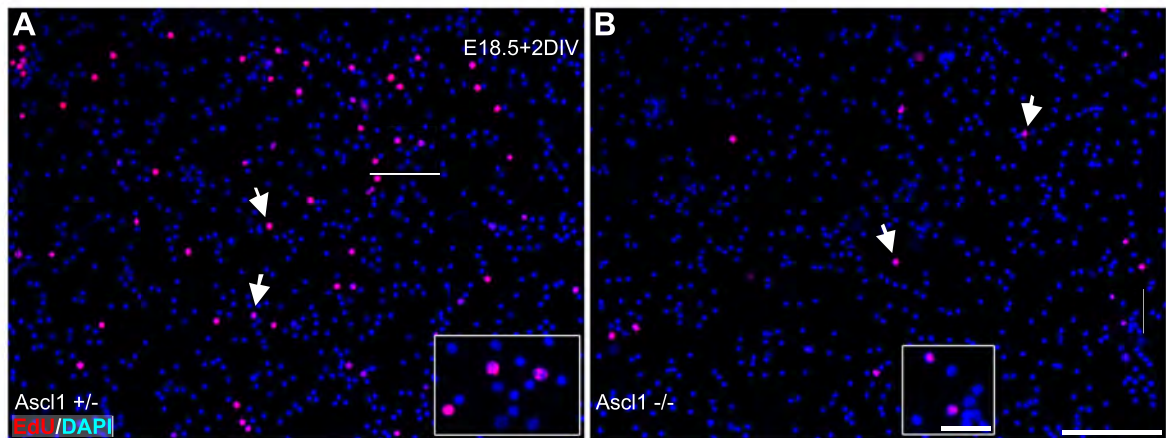

**C** Percent in S-phase After 2 Days of Culture

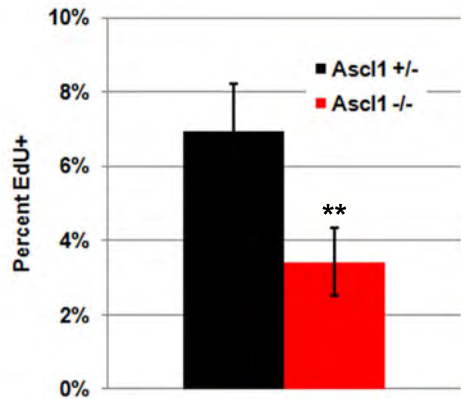

Supplement: dev064006figs8.pdf [file dev064006figs8.pdf]

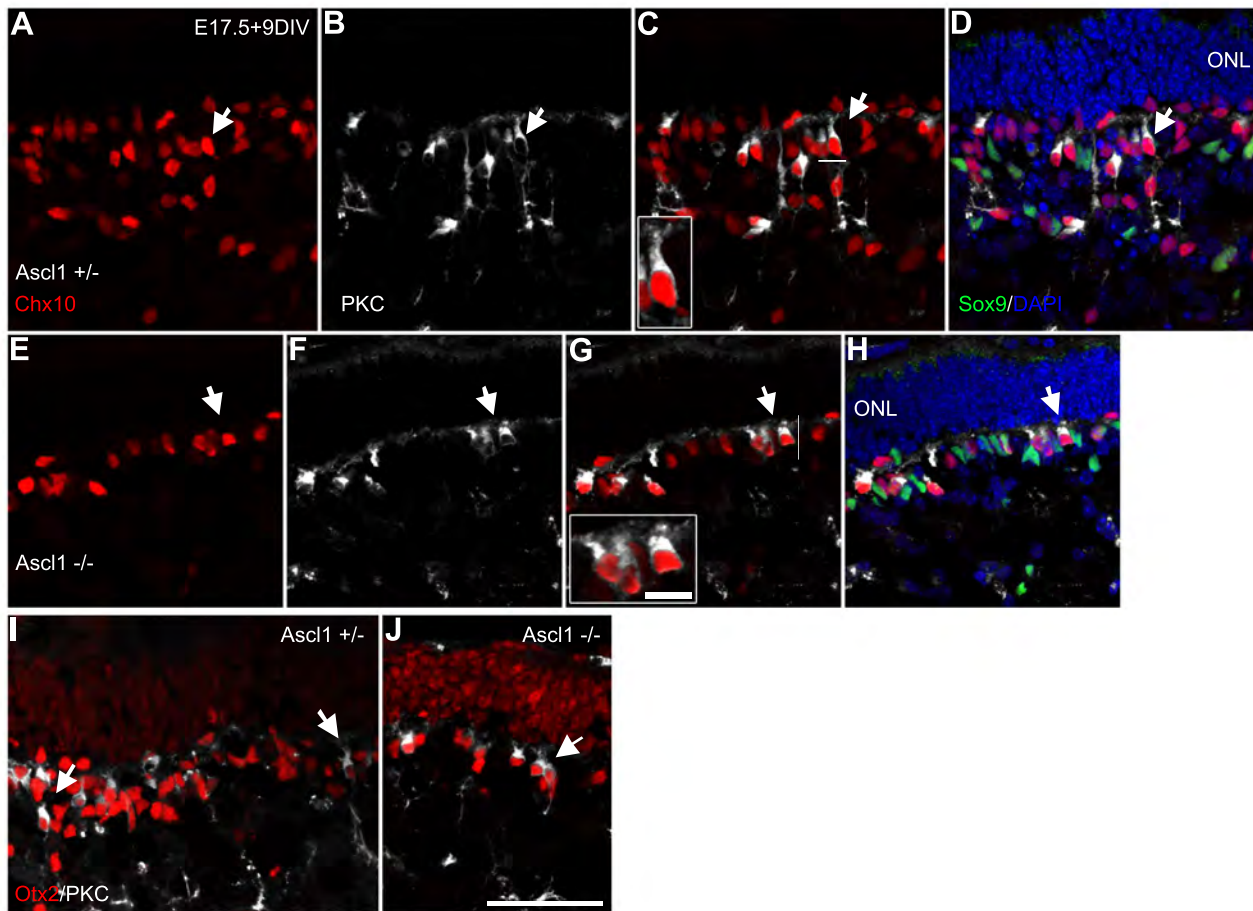

Supplement: dev064006figs9.pdf [file dev064006figs9.pdf]
